# Supplementary material
Source: MDPI journal article supplement (https://www.mdpi.com/1424-8247/14/6/541)
Supplement: s1 [file s1]

## Supplementary Material

### Scaffold Hopping of $\alpha$ -Rubromycin Enables Direct Access to the FDA-approved Cromoglicic acid as a SARS-CoV-2 M<sup>Pro</sup> Inhibitor

Hani A. Alhadrami, Ahmed M. Sayed, Heba Alkhatabi, Nabil A. Alhakamy and Mostafa E. Rateb

**Table S1.** Results of ScafA similarity search in the FDA-approved drugs

| Compound                | Similarity Score | Structure                                                                            | Class                        |
|-------------------------|------------------|--------------------------------------------------------------------------------------|------------------------------|
| Cromoglicic acid        | 0.84             | 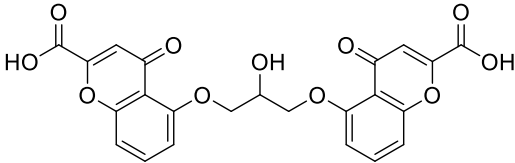   | Mast Cell stabilizer*        |
| Nafcillin               | 0.3              |   | $\beta$ -Lactam antibiotic** |
| Amoxicillin             | 0.15             |  | $\beta$ -Lactam antibiotic** |
| Benzylpenicillin        | 0.11             |  | $\beta$ -Lactam antibiotic** |
| Phenoxymethylpenicillin | 0.11             |  | $\beta$ -Lactam antibiotic** |

|               |      |                                                                                      |                              |
|---------------|------|--------------------------------------------------------------------------------------|------------------------------|
| Ticarcillin   | 0.11 | 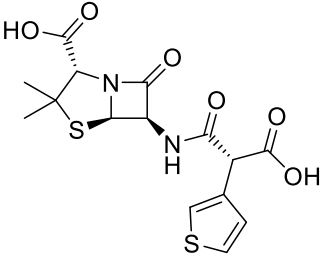   | $\beta$ -Lactam antibiotic** |
| Carbenicillin | 0.11 |    | $\beta$ -Lactam antibiotic** |
| Ampicillin    | 0.11 |    | $\beta$ -Lactam antibiotic** |
| Cefalexin     | 0.11 |   | $\beta$ -Lactam antibiotic** |
| Cefuroxime    | 0.11 |  | $\beta$ -Lactam antibiotic** |
| Dicoumarol    | 0.1  |  | Anticoagulant <sup>#</sup>   |
| Warfarin      | 0.1  |  | Anticoagulant <sup>#</sup>   |

|               |     |                                                                                    |                            |
|---------------|-----|------------------------------------------------------------------------------------|----------------------------|
| Acenocoumarol | 0.1 | 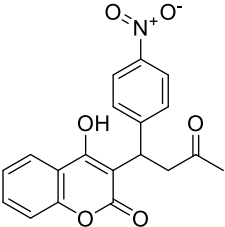 | Anticoagulant <sup>#</sup> |
|---------------|-----|------------------------------------------------------------------------------------|----------------------------|

\*This is the most similar hit. In addition, it showed very low toxicity in vitro

\*\* Frequent uncontrolled use of antibiotics can lead to the emergence of bacterial resistance [1].

<sup>#</sup>Anticoagulants are dangerous drugs with low therapeutic window [2].

## References

1. Lucien, M. A. B., Canarie, M. F., Kilgore, P. E., Jean-Denis, G., F n đon, N., Pierre, M., ... & Ramon-Pardo, P. (2021). Antibiotics and antimicrobial resistance in the COVID-19 era: Perspective from resource-limited settings. *International Journal of Infectious Diseases*, 104, 250-254.
2. DUFF, I. F., & SHULL, W. H. (1949). Fatal Hemorrhage in Dicumarol® Poisoning. *Journal of the American Medical Association*, 139(12), 762-766.
